# Supplementary material for: Development and Validation of the Reproductive Health Literacy Questionnaire for Chinese Unmarried Youth
Source: Research Square preprint supplement (doi:10.21203/rs.3.rs-571910/v1), 2021-06-07
Supplement: Supplementary file 1 [file 173b5aee8a8485953f0ee0b6.docx]

**Statements of Authorship**

Manuscript title: **Development and validation of the reproductive health literacy questionnaire for Chinese unmarried youth**

Authors: Xuemei Ma1; Yufan Yang1; Qian Wei; Hong Jiang; Huijing Shi*.

1 Co-first authors.

* Corresponding author.

Xuemei Ma, participated in data interpretation, drafted the manuscript and revised the manuscript.

Yufan Yang, participated in study design, and conducted data acquisition, analysis and interpretation.

Qian Wei, participated in result interpretation and reviewed the manuscript.

Hong Jiang, participated in study design and reviewed the manuscript.

Huijing Shi, obtained project funding, conceptualised and designed the study, supervised completion of the manuscript, and revised the manuscript.

All authors have approved the final manuscript.

The corresponding author confirms on behalf of all authors that the authors statements above is true.

Name: Huijing Shi


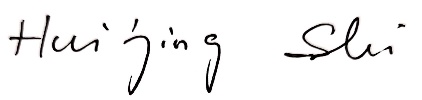
Signature:

Date: May 26th, 2021
